# Supplementary material for: Integrated Network Pharmacology Reveals the Mechanism of Action of Xianlinggubao Prescription for inflammation in Osteoarthritis
Source: Research Square preprint supplement (doi:10.21203/rs.3.rs-3299769/v1), 2023-09-21
Supplement: Supplementary file 1 [file b8e15b7ac527b3f143c25bab.docx]

**Table 2 The information of the bioactive compounds of Xianling Gubao Prescription (XLGB), Yinyanghuo (YYH), Xuduan (XD), Danshen (DS), Dihuang (DH), Zhimu (ZM), Buguzhi (BGZ).**

| **Molecule Name** | **OB (%)** | **DL** | **Degree** | **Herb** | **Structure** |
| --- | --- | --- | --- | --- | --- |
| **Quercetin** | 46.43 | 0.28 | 217 | YYH  DS |  |
| **Icaritin** | 45.41 | 0.44 | 19 | YYH |  |
| **8-Isopentenyl-kaempferol** | 37.58 | 0.71 | 13 | YYH |  |
| **Icariin** | 41.58 | 0.61 | 19 | YYH |  |
| **Luteolin** | 36.16 | 0.25 | 133 | YYH  DS |  |
| **Chryseriol** | 35.85 | 0.27 | 11 | YYH |  |
| **C-Homoerythrinan,1,6-didehydro-3,15,16-trimethoxy** | 39.14 | 0.49 | 19 | YYH |  |
| **Kaempferol** | 41.88 | 0.24 | 125 | YYH  ZM  DS |  |
| **DFV** | 32.76 | 0.18 | 8 | YYH |  |
| **Linoleyl acetate** | 42.1 | 0.2 | 7 | YYH |  |
| **Poriferast-5-en-3beta-one** | 36.91 | 0.75 | 5 | YYH |  |
| **Magnograndiolide** | 63.71 | 0.19 | 5 | YYH |  |
| **Gentisin** | 64.06 | 0.21 | 39 | XD |  |
| **Beta-sitosterol/Sitosterol** | 36.91 | 0.75 | 105 | XD  DH |  |
| **(E,E)-3,5-Di-O-caffeoylquinic acid** | 48.14 | 0.68 | 18 | XD |  |
| **Japonine** | 44.11 | 0.25 | 24 | XD |  |
| **Sylvestroside III** | 48.02 | 0.53 | 4 | XD |  |
| **Asperglaucide** | 58.02 | 0.52 | 3 | ZM |  |
| **Anhydroicaritin** | 45.41 | 0.44 | 24 | ZM |  |
| **Timosaponin B III_qt** | 35.26 | 0.87 | 2 | ZM |  |
| **Stigmasterol** | 43.83 | 0.76 | 84 | ZM  DH  DS |  |
| **(Z)-3-(4-hydroxy-3-methoxy-phenyl)-N-[2-(4-hydroxyphenyl)ethyl]acrylamide** | 118.35 | 0.26 | 4 | ZM |  |
| **Diosgenin** | 80.88 | 0.81 | 24 | ZM |  |
| **Coumaroyltyramine** | 112.9 | 0.2 | 5 | ZM |  |
| **Marmesin** | 50.28 | 0.18 | 9 | ZM |  |
| **(2S)-7-hydroxy-2-(4-hydroxyphenyl)-8-(3-methylbut-2-enyl)chroman-4-one** | 36.57 | 0.32 | 8 | BGZ |  |
| **Daucosterol** | 20.63 | 0.63 | 26 | BGZ |  |
| **Aucuboside** | 35.56 | 0.33 | 6 | DH |  |
| **1,2,5,6-tetrahydrotanshinone** | 38.75 | 0.36 | 14 | DS |  |
| **Poriferasterol** | 43.83 | 0.76 | 2 | DS |  |
| **Poriferast-5-en-3beta-ol** | 36.91 | 0.75 | 5 | DS |  |
| **Dehydrotanshinone II A** | 43.76 | 0.4 | 11 | DS |  |
| **Baicalin** | 40.12 | 0.75 | 80 | DS |  |
| **Digallate** | 61.85 | 0.26 | 2 | DS |  |
| **2-isopropyl-8-methylphenanthrene-3,4-dione** | 36.16 | 0.25 | 37 | DS |  |
| **Methylenetanshinquinone** | 40.86 | 0.23 | 14 | DS |  |
| **Danshenol B** | 43.67 | 0.21 | 11 | DS |  |
| **Danshenol A** | 57.95 | 0.56 | 6 | DS |  |
| **Salvilenone** | 30.38 | 0.38 | 6 | DS |  |
| **Cryptotanshinone** | 52.34 | 0.4 | 21 | DS |  |
| **Dihydrotanshinone Ⅰ** | 45.04 | 0.36 | 10 | DS |  |
| **C09092** | 36.07 | 0.25 | 7 | DS |  |
| **Isocryptotanshi** | 54.98 | 0.39 | 18 | DS |  |
| **Isotanshinone II** | 49.92 | 0.4 | 16 | DS |  |
| **Miltirone** | 38.76 | 0.25 | 17 | DS |  |
| **1-methyl-8,9-dihydro-7H-naphtho[5,6-g]benzofuran-6,10,11-trione** | 34.72 | 0.37 | 11 | DS |  |
| **2R)-3-(3,4-dihydroxyphenyl)-2-[(Z)-3-(3,4-dihydroxyphenyl)acryloyl]oxy-pRopionic acid** | 109.38 | 0.35 | 5 | DS |  |
| **Salvilenone Ⅰ** | 32.43 | 0.23 | 6 | DS |  |
| **Salviolone** | 31.72 | 0.24 | 6 | DS |  |
| **(6S)-6-hydroxy-1-methyl-6-methylol-8,9-dihydro-7H-naphtho[8,7-g]benzofuran-10,11-quinone** | 75.39 | 0.46 | 5 | DS |  |
| **Tanshindiol B** | 42.67 | 0.45 | 4 | DS |  |
| **Przewaquinone E** | 42.85 | 0.45 | 4 | DS |  |
| **Tanshinone iia** | 49.89 | 0.4 | 27 | DS |  |
| **Aloe-Emodin** | 36.91 | 0.75 | 29 | DS |  |
| **Rhein** | 83.38 | 0.24 | 17 | DS |  |
